# Supplementary material
Source: PubMed Central journal article supplement (PMC4593892)
Supplement: Supp_Data.pdf [file Supp_Data.pdf]

TABLE S2. PREVALENCE, INTENSITY, AND ABUNDANCE OF EACH TICK SPECIES INFESTING SHEEP AND GOATS

| Host  | Tick species         | Number of ticks/total (%) | Prevalence <sup>a</sup> (%) | Intensity <sup>b</sup> | Abundance <sup>c</sup> |
|-------|----------------------|---------------------------|-----------------------------|------------------------|------------------------|
| Sheep | <i>R. turanicus</i>  | 485/919 (52.8)            | 117/260 (45.0)              | 485/117 (4.14)         | 485/260 (1.86)         |
|       | <i>R. sanguineus</i> | 404/919 (44.0)            | 112/260 (43.1)              | 404/112 (3.60)         | 404/260 (1.55)         |
|       | <i>R. annulatus</i>  | 30/919 (3.3)              | 12/260 (4.6)                | 30/12 (2.50)           | 30/260 (0.11)          |
|       | Total                | 919/919 (100)             | 241/260 (92.7)              | 919/241 (3.81)         | 919/260 (3.53)         |
| Goat  | <i>R. turanicus</i>  | 243/304 (79.9)            | 98/303 (32.6)               | 243/98 (2.47)          | 243/303 (0.80)         |
|       | <i>R. bursa</i>      | 44/304 (14.5)             | 22/303 (7.3)                | 44/22 (2)              | 44/303 (0.14)          |
|       | <i>R. sanguineus</i> | 15/304 (4.9)              | 13/303 (4.3)                | 15/13 (1.15)           | 15/303 (0.05)          |
|       | <i>H. excavatum</i>  | 2/304 (0.7)               | 2/303 (0.7)                 | 2/2 (1)                | 2/303 (0.01)           |
|       | Total                | 304/304 (100)             | 113/303 (37.3)              | 304/113 (2.69)         | 304/303 (1.00)         |

<sup>a</sup>Infestation prevalence (%) = 100 × number of infested animals/number of examined animals.

<sup>b</sup>Infestation intensity = number of ticks/number of infested animals.

<sup>c</sup>Abundance = number of ticks/number of examined animals.

TABLE S3. PREVALENCE RATES OF *ANAPLASMA OVIS* ACCORDING TO GOVERNORATES AND LOCALITIES IN GOATS AND SHEEP FROM TUNISIA

| Host  | Governorate | Locality | Number            | Positive (% ± CI <sup>a</sup> ) |
|-------|-------------|----------|-------------------|---------------------------------|
| Goat  | Bizerte     | El Alia  | 70                | 51 (72.9 ± 0.10)                |
|       |             | Sejnane  | 80                | 63 (78.8 ± 0.05)                |
|       |             | Joumine  | 81                | 36 (44.4 ± 0.11)                |
|       |             | Total    | 231               | 150 (64.9 ± 0.06)               |
|       | Beja        | Amdoun   | 72                | 48 (66.7 ± 0.11)                |
| Total |             | 303      | 198 (65.3 ± 0.05) |                                 |
| Sheep | Bizerte     | El Alia  | 140               | 128 (91.4 ± 0.05)               |
|       |             | Khetmine | 120               | 116 (96.7 ± 0.03)               |
|       |             | Total    | 260               | 244 (93.8 ± 0.03)               |

<sup>a</sup>CI, 95% confidence interval.
