# Supplementary material
Source: PubMed Central journal article supplement (PMC4593892)
Supplement: Supp_Table1.pdf [file Supp_Table1.pdf]

## Supplementary Data

TABLE S1. PRIMERS USED FOR DETECTION AND/OR CHARACTERIZATION OF *ANAPLASMA PHAGOCYTOPHILUM* AND/OR RELATED SPECIES AND *A. OVIS* IN SHEEP AND GOATS IN THE PRESENT STUDY

| Assay                                                | Primer                       | Sequence 5' to 3'                                                                          | Target gene     | Amplicon size (bp) | Reference              |
|------------------------------------------------------|------------------------------|--------------------------------------------------------------------------------------------|-----------------|--------------------|------------------------|
| First PCR<br><i>Anaplasma</i> sp. <sup>a</sup>       | EE-1                         | TCCTGGCTCAGAACGAACGCTGGCGGC                                                                | <i>16S rRNA</i> | 1433               | Barlough et al. (1996) |
|                                                      | EE-2                         | AGTCACTGACCCAACCTTAAATGGCTG                                                                |                 |                    |                        |
| Second PCR<br><i>A. phagocytophilum</i> <sup>b</sup> | SSAP2f <sup>c</sup>          | GCTGAATGTGGGGATAATTTAT                                                                     | <i>16S rRNA</i> | 641                | Kawahara et al. (2006) |
|                                                      | SSAP2r <sup>c</sup>          | ATGGCTGCTTCCTTTCGGTTA                                                                      |                 |                    |                        |
| Nested PCR<br><i>A. phagocytophilum</i> <sup>d</sup> | EphplgroEL-F                 | ATGGTATGCAGTTTGATCGC                                                                       | <i>groEL</i>    | 624                | Alberti et al. (2005)  |
|                                                      | EphplgroEL-R                 | TCTACTCTGTCTTTGCGTTC                                                                       |                 | 573                |                        |
|                                                      | EphplgroEL-F<br>EphgroEL-R   | ATGGTATGCAGTTTGATCGC<br>TTGAGTACAGCAACACCACCGGAA                                           |                 |                    |                        |
| Single PCR<br><i>A. ovis</i>                         | AovisMSP4Fw                  | TGAAGGGAGCGGGGTCATGGG                                                                      | <i>msp4</i>     | 344                | Torina et al. (2012)   |
|                                                      | AovisMSP4Rev                 | GAGTAATTGCAGCCAGGGACTCT                                                                    |                 |                    |                        |
| LAMP<br><i>A. ovis</i>                               | MSP4F3                       | GGGAGCTCCTATGAATTACAGAGAA<br>TTGTTTAC                                                      | <i>msp4</i>     | —                  | Ma et al. (2012)       |
|                                                      | MSP4B3                       | CCGGATCCTTAGCTGAACAGGA<br>ATCTTGC                                                          |                 |                    |                        |
|                                                      | MSP4FIP<br>MSP4BIP<br>MSP4LF | GTGTTGCACACAGATTTGCC<br>AGGCTTTTGCTTCTCCGG<br>GCCCTGTAGGCTAGCTTTGTG-CCCA<br>TATGTGTGTGCCGG |                 |                    |                        |
|                                                      | MSP4LB                       | TGGTGGTAGGTGGGTTCTACCA-ATGT<br>GCGGGTATGTCCTTG                                             |                 |                    |                        |
|                                                      | MSP4F3<br>MSP4B3             | TGTCGACAAAGCTAGCACC<br>CGGACTCTTGACGAGTCTT                                                 |                 |                    |                        |
| Single PCR<br><i>A. ovis/A. marginale</i>            | MSP45 <sup>e</sup>           | GGGAGCTCCTATGAATTACAGAG<br>AATTGTTTAC                                                      | <i>msp4</i>     | 852                |                        |
|                                                      | MSP43 <sup>e</sup>           | CCGGATCCTTAGCTGAACAGGA<br>ATCTTGC                                                          |                 |                    |                        |

<sup>a</sup>First *Anaplasma* catch-all PCR.

<sup>b</sup>For *16S rRNA*, this PCR is a second PCR, performed after the first PCR, allowing the detection of *A. phagocytophilum* and related species according to Ybañez et al. (2012a).

<sup>c</sup>Primers used in PCR and sequencing reactions for detection and characterization of *A. phagocytophilum* and related species.

<sup>d</sup>Nested PCR performed for the specific detection of *A. phagocytophilum*.

<sup>e</sup>Primers used in PCR and sequencing reactions for detection and/or characterization of *A. ovis*.
